# Supplementary material for: Tenogenesis of Decellularized Porcine Achilles Tendon Matrix Reseeded with Human Tenocytes in the Nude Mice Xenograft Model
Source: PubMed Central journal article supplement (PMC6073795; doi:10.3390/ijms19072059), 2018-07-15
Supplement: ijms-19-02059-s001.pdf [file ijms-19-02059-s001.pdf]

Supplemental Material

**xECM reseeded 6 w**

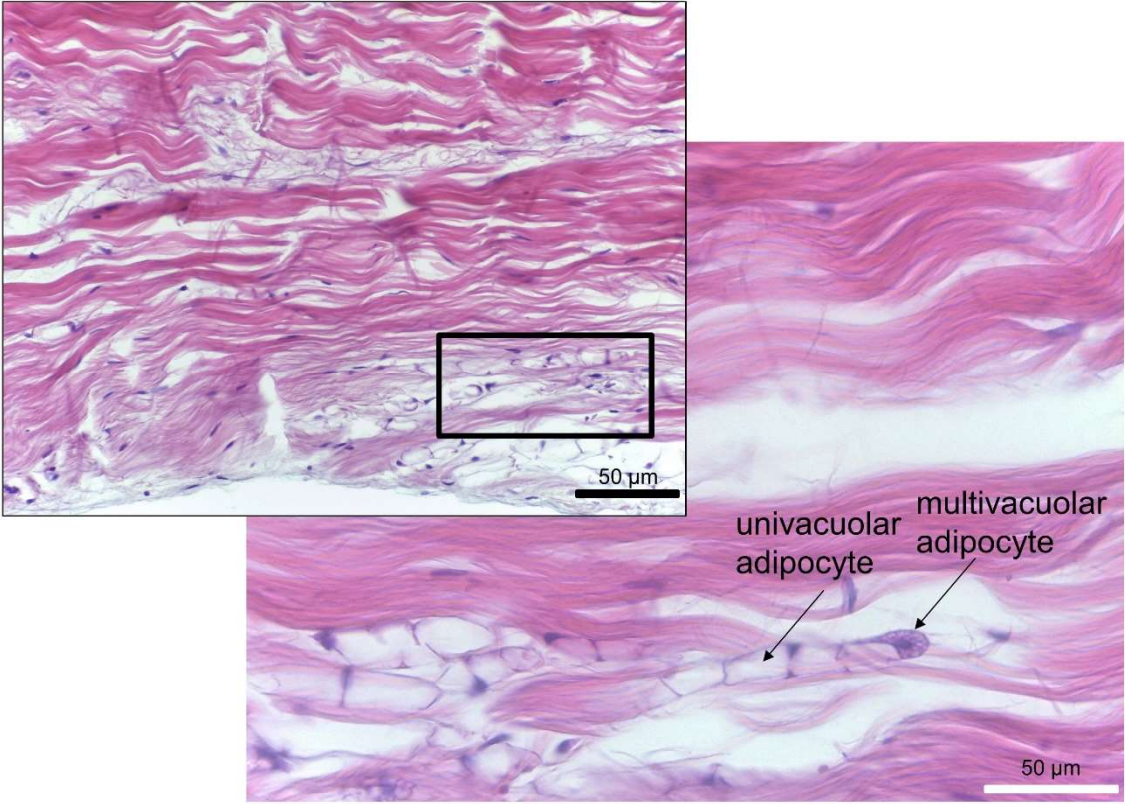

**Supplemental Figure S1.** Developing adipocytes in decellularized xECM seeded with human tenocytes after 6 weeks *in vivo*. Rows of unipolar adipocytes arise between ECM fiber bundles with a multipolar adipocyte at its end after 6 weeks (w).
